# Supplementary material for: Early life antibiotics and childhood gastrointestinal disorders: a systematic review
Source: PubMed Central journal article supplement — BMJ Paediatr Open. 2021 Mar 3;5(1):e001028. doi: 10.1136/bmjpo-2021-001028 (PMC7931764; doi:10.1136/bmjpo-2021-001028), 2021-03-03
Supplement: bmjpo-2021-001028supp002.pdf [file bmjpo-2021-001028supp002.pdf]

Supplementary table 2 Confounders in the quality assessment

| Study outcome           | Most important                                   | Second important                                                            |
|-------------------------|--------------------------------------------------|-----------------------------------------------------------------------------|
| IBD                     | Presence of IBD in first degree family members   | Ethnicity and/or age                                                        |
| EoE                     | Sex                                              | Presence of other atopic diseases and/or ethnicity                          |
| CeD                     | Presence of CeD in first degree family member    | Sex and/or season of birth and/or the presence of other autoimmune diseases |
| Colics                  | Presence of atopy in first degree family members | Presence of GERD and/or type of feeding and/or being a first child          |
| Functional constipation | Maternal education/social economic status        | Sex and/or age                                                              |
| Abdominal pain          | Lactose intolerance/cow's milk allergy           | Anxiety/depression/stress in the child and/or the parents                   |
